# Gene flow biases population genetic inference of recombination rate

*K. Samuk*<sup>1,2\*</sup> & *M.A.F. Noor*<sup>1</sup>

<sup>1</sup> Department of Biology, Duke University.

<sup>2</sup> Department of Evolution, Ecology, and Organismal Biology, University of California, Riverside

\*Corresponding author, [ksamuk@ucr.edu](mailto:ksamuk@ucr.edu)

## 1 Abstract

2 Accurate estimates of the rate of recombination are key to understanding a host of  
3 evolutionary processes as well as the evolution of recombination rate itself. Model-  
4 based population genetic methods that infer recombination rates from patterns of  
5 linkage disequilibrium (LD) in the genome have become a popular method to estimate  
6 rates of recombination. However, these LD-based methods make a variety of simplifying  
7 assumptions about the populations of interest that are often not met in natural  
8 populations. One such assumption is the absence of gene flow from other populations.  
9 Here, we use forward-time population genetic simulations of isolation-with-migration  
10 scenarios to explore how gene flow affects the accuracy of LD-based estimators of  
11 recombination rate. We find that moderate levels of gene flow can result in either the  
12 overestimation or underestimation of recombination rates by up to 20-50% depending  
13 on the timing of divergence. We also find that these biases can affect the detection of  
14 interpopulation differences in recombination rate, causing both false positive and false  
15 negatives depending on the scenario. We discuss future possibilities for mitigating  
16 these biases and recommend that investigators exercise caution and confirm that their  
17 study populations meet assumptions before deploying these methods.

## 18 Introduction

19 Recombination rate, the number of crossovers per unit genome per generation, plays a  
20 key role in shaping evolutionary processes and diversity in the genome. For example,  
21 through the action of linked selection, local rates of recombination are a chief  
22 determinant of patterns of genetic diversity throughout the genome (Begun & Aquadro,

23 1992; Burri, 2017; Cutter, 2019; Haddrill et al., 2014; Korunes et al., 2021). Genome-wide  
24 rates of recombination also modulate diverse processes such as adaptation, speciation,  
25 and introgression (Dapper & Payseur, 2017; Samuk et al., 2017; Schumer et al., 2018;  
26 Stapley et al., 2017). There is also a growing appreciation that recombination rate is  
27 itself a trait that varies and evolves (Dumont & Payseur, 2008; Hunter et al., 2016;  
28 Johnston et al., 2016; Ritz et al., 2017; Samuk et al., 2020; Stapley et al., 2017).  
29 Accordingly, there has been great interest in efficient and accurate methods for  
30 estimating recombination rates.

31 Current methods for estimating recombination rates fall into two broad classes of  
32 methods: direct and indirect (Peñalba & Wolf, 2020). Of the direct measures, the three  
33 most popular approaches are linkage mapping, gamete sequencing, and cytological  
34 methods. With classical linkage mapping, map distances between genetic markers are  
35 measured by quantifying recombinant markers in the context of a genetic cross or  
36 pedigree (Broman, 2010; Rastas, 2017). The resolution of this approach is limited only by  
37 marker density and the sample size of individuals, but larger sample sizes can be  
38 grueling to carry out in the laboratory or unavailable in some populations. Further,  
39 identifying suitable diagnostic mapping markers can be limiting in some cases (e.g. in a  
40 highly homozygous population, Broman, 2010). Direct sequencing of pools of  
41 recombinant gamete genomes from single individuals using long/linked read  
42 sequencing is a newer approach that alleviates many of the issues of traditional  
43 mapping, but still requires differentiated markers to score crossover events between  
44 homologous chromosomes (Dréau et al., 2019; Rommel Fuentes et al., 2019; Xu et al.,  
45 2020). Cytological methods bypass this requirement by directly visualizing

46 recombination-associated protein complexes in cell populations undergoing meiosis  
47 (Peterson et al., 2019; Peterson & Payseur, 2021). However, cytological methods are  
48 limited by the spatial resolution at which such visualization can occur (e.g. the  
49 resolution of immunostained gamete karyotypes, Peterson et al., 2019).

50 Because all direct methods of measuring recombination rates are fairly laborious, there  
51 has been increased interest in indirect measures of recombination rate that leverage  
52 readily available population genetic data. Chief among these are model-based methods  
53 that infer rates of recombination from patterns of linkage disequilibrium (LD), (Auton &  
54 McVean, 2007; Chan, Song, et al., 2012; Kamm et al., 2016; Spence & Song, 2019). These  
55 methods attempt to estimate recombination rates by statistically fitting recombination  
56 rates (derived from population genetic models/simulations) to observed patterns of LD.  
57 Rather than inferring recombination rate directly, LD-based estimators infer a  
58 *population scaled recombination rate*,  $\rho = 4N_e r$ , where  $N_e$  is the effective population size  
59 and  $r$  is the theoretical per-generation recombination rate. LD-based methods are  
60 attractive because they (1) generally only require population-scale genomic data and (2)  
61 are very fast, often only requiring several computational hours or less (Spence & Song,  
62 2019) and (3) are informative of time-averaged population historical recombination rates  
63 (Gil McVean & Auton, 2007). Accordingly, LD-based estimates of recombination rates  
64 have become extremely popular, and now vastly outnumber direct measures in the  
65 literature (Peñalba & Wolf, 2020; Stapley et al., 2017). These methods have also begun to  
66 be used to perform interpopulation comparisons of recombination rates (Peñalba &  
67 Wolf, 2020; Stapley et al., 2017).

68 Like all models, LD-based estimators of recombination rate make a variety of  
69 simplifying assumptions about the populations of interest. For one, they generally  
70 assume that the populations/loci of interest are evolving largely neutrally and have  
71 reached population genetic equilibrium in a number of ways (Stumpf & McVean, 2003).  
72 In particular, most methods assume that the populations being studied have reached an  
73 equilibrium between recombination and population scaled mutation, such that LD  
74 accurately reflects patterns of recombination rate (G. McVean, 2007). Further, it is  
75 generally assumed that any form of selection that might distort patterns of LD (e.g.  
76 sweeps) has not recently occurred (Chan, Song, et al., 2012). Finally, these methods make  
77 the general assumption that demographic processes that distort genome-wide patterns  
78 of LD, such as population size changes, have not occurred (recall that  $\rho$  is directly  
79 dependent on  $N_e$ , Auton & McVean, 2007).

80 While some of these assumptions may be robust to violation, work has shown that some  
81 violations can result in biased estimates. For example, (Dapper & Payseur, 2018) showed  
82 that recombination estimates from LDhat (Gil McVean & Auton, 2007) are highly  
83 sensitive to changes in population size. This can be ameliorated in some cases by  
84 incorporating known changes in population size into the estimation procedure, such as  
85 implemented in the software pyrho (Spence & Song, 2019).

86 Along with changes in population size and selection, another process that can greatly  
87 alter patterns of LD is gene flow. Gene flow and subsequent admixture between  
88 diverged populations can have complex effects on patterns of LD within each  
89 population (Nei & Li, 1973; Ohta, 1982). These effects range from large and genomically

90 variable increases in LD due to segregation of divergent haplotypes, to genome-wide  
91 decreases in LD as populations become coupled and increase local  $N_e$  (Nei & Li, 1973;  
92 Ohta, 1982). While it is now widely accepted that gene flow is commonplace in natural  
93 populations (Barton, 2008; Mallet, 2005; Suvorov et al., 2021; Waples & Gaggiotti, 2006),  
94 and there has not been a systematic study of the effects of gene flow on LD-based  
95 measures of recombination. Further, it remains unclear how gene flow (or any other  
96 violation of assumptions) impacts our ability to detect differences in recombination rate  
97 *between* (as opposed to *within*) populations using LD-based methods.

98 Here, we address these issues using forward-time population genetic simulations. We  
99 attempt to answer two specific questions. First, how does gene flow between  
100 populations affect the precision and accuracy of LD-based estimates of recombination  
101 rate within populations? Secondly, how does gene flow affect our ability to detect  
102 evolved differences in recombination rate between populations? Our primary goal is to  
103 answer these questions in the context of a core set of realistic demographic scenarios,  
104 and not perform an exhaustive exploration of parameter space. Overall we hope to help  
105 investigators understand key sources of bias in LD-based estimates of recombination  
106 rate in natural populations and highlight areas of future development.

## 107 Methods

### 108 Code availability

109 All scripts used in the analyses described below are available as a repository on Github  
110 ([http://github.com/ksamuk/LD\\_recomb](http://github.com/ksamuk/LD_recomb)).

## 111 Forward time simulations with SLiM

112 To explore how the timing and amount of gene flow affect estimates of recombination  
113 rate, we performed forward-time population genetic simulations using SLiM version 3.3  
114 (Haller & Messer, 2019). The basic form of all the simulations was an isolation-with-  
115 migration scenario: a single ancestral population diverges into two subpopulations with  
116 a static amount of bidirectional gene flow (Figure 1). Populations were composed of  
117 diploid individuals with 100kb genomes arranged in a single chromosome. We used  
118 genome-wide average estimates of effective population size, mutation rate, and  
119 empirical recombination rate from natural populations of *Drosophila melanogaster*  
120 (Adrion, Cole, et al., 2020): Mutation rate =  $5.49 \times 10^{-9}$  (Li & Stephan, 2006); Recombination  
121 rate =  $2.23 \times 10^{-8}$ , (average of chromosome 2R, Comeron et al., 2012);  $N_e = 1.72M$  (Li &  
122 Stephan, 2006). Recombination and mutation rates were conservatively modeled as  
123 uniform across the 100kb genome. Following standard practice for forward-time  
124 simulations, all simulations were run with an *in silico* population size of  $N=1000$ , and  
125 simulated mutation and recombination rates scaled by a factor of  $N_e/N$  as per the SLiM  
126 manual (Haller & Messer, 2019). Note that generation times are also subject to scaling,  
127 and for simplicity, we will refer to all generations in terms of back-transformed actual  
128 generations rather than SLiM generations (1 SLiM generation  $\approx 1751$  actual generations  
129 with our scaling factor).

## 130 Parameter space

131 To explore how variation in gene flow affects estimates of recombination, we varied the  
132 amount of gene flow over five orders of magnitude: 0, 0.01, 0.1, 1, 10, 100, in standard  
133 units of  $N_e m$  (the product of the effective population size and the migration rate). These

134 values were chosen to encompass total isolation ( $N_e m = 0$ ), limited gene flow ( $N_e m =$   
135  $0.01-0.1$ ), moderate gene flow in interconnected metapopulations ( $N_e m = 1-10$ , Morjan &  
136 Rieseberg, 2004; Waples & Gaggiotti, 2006), and a scenario of a nascent hybrid swarm  
137 ( $N_e m = 100$ ). We also varied the timing of the onset of gene flow, with gene flow  
138 beginning either immediately after divergence or after a period of isolation. We  
139 performed preliminary simulations to determine a period of isolation ( $\sim 1.7M$   
140 generations in our case) that produced levels of genomic divergence (Figure S1) similar  
141 to those observed in natural population pairs that exhibit genome-wide genetic  
142 divergence but still actively exchange genes ( $F_{ST} \sim 0.4$ , Morjan & Rieseberg, 2004; Roux  
143 et al., 2016). Finally, to explore how gene flow impacts the detection of population  
144 *differences* in recombination rate, we modeled scenarios where recombination rate either  
145 remains constant in both subpopulations or instantaneously increases by a factor of 2 at  
146 the time of divergence in one of the two subpopulations (always subpopulation two).  
147 This magnitude of this difference is well within the range of variation in recombination  
148 rate reported for a wide variety of species (Stapley et al., 2017). In biological terms, an  
149 instantaneous increase in population recombination rate could be readily mediated by  
150 an environmental change (e.g. temperature, Lloyd et al., 2018) or via a change in mating  
151 system (Brandvain & Wright, 2016). We note that this instantaneous change is a “best  
152 case” scenario for detecting interpopulation differences in recombination rate, and thus  
153 any loss of power to detect differences in recombination that occurs due to gene flow  
154 will be conservative.



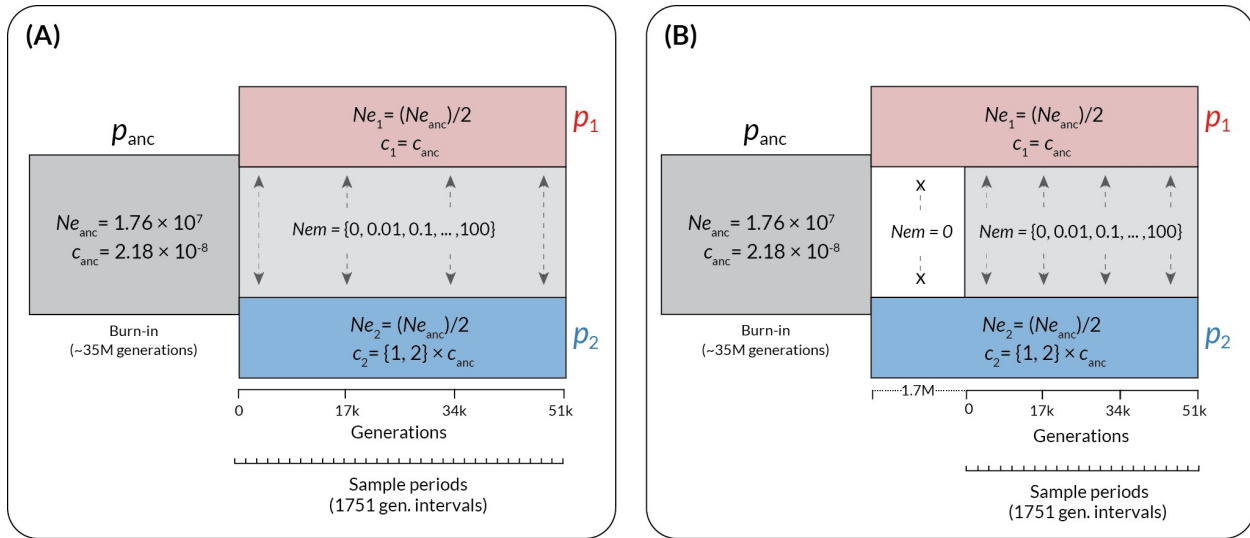

155 **Figure 1** | The structure of the forward-time simulations performed in SLiM. Time in back-transformed  
 156 generations is shown along the x-axis, and the populations in existence at a given time are shown as  
 157 rectangles.  $p_{anc}$  = the ancestral population,  $p_1$  = the subpopulation with unchanged recombination rate, and  
 158  $p_2$  = the subpopulation with increased recombination rate (if applicable). Effective population sizes ( $N_e$ )  
 159 and recombination rates ( $c$ , in units of cM/Mb) are shown for each population, with the values for the  
 160 subpopulations shown relative to the ancestral value. Variable elements of the simulation are shown in  
 161 braces. Time in generations post-divergence is indicated below the plots, with the pre-contact isolation  
 162 period in (B) shown as a dotted line preceding the main axis. Sample periods indicate intervals at which  
 163 genotypes were output for analysis.

#### 164 Details of demographic events

165 Each simulation began with a single population of size  $N_{e_{anc}}$ , which evolved for a 35M  
 166 generation burn-in period (following the general practice of a 10-20  $N_e$  burn-in period,  
 167 Haller & Messer, 2019). This initial period was followed by divergence into two  
 168 subpopulations, each with size  $N_{e_{anc}}/2$ . Gene flow (for cases where  $N_{em} > 0$ ) began  
 169 immediately at the time of divergence or after a 1.7M generation period of isolation and  
 170 was symmetrical in magnitude and bidirectional. Changes in recombination rate

171 occurred at the time of divergence and instantaneously applied to all individuals in  
172 subpopulation two only.

173 Starting at the time of divergence and thereafter in intervals of 1751 generations, we  
174 collected a random sample of 25 individuals (a total of 50 haploid genomes) from each  
175 population and saved their complete genotypic at all sites in VCF format. We stopped  
176 the simulations after 51 000 generations. Each parameter combination was replicated  
177 100 times, for a total number of  $\sim n=48\ 000$  population samples.

178 Estimation of recombination rate using pyrho

179 While there are a variety of LD-based estimators of recombination rate, we elected to  
180 use pyrho (Spence & Song, 2019) for estimation in this study. It shares its statistical  
181 foundation with the most widely used LD-based estimators (LD-hat & LD-helmet; Chan,  
182 Jenkins, et al., 2012; Gil McVean & Auton, 2007) while also having the ability to account  
183 for changes in effective population size such as we are modeling here (Spence & Song,  
184 2019). As such, any estimation biases caused by gene flow will likely affect those  
185 approaches as least as much they affect pyrho. Direct comparisons with other methods  
186 are complicated by the fact that pyrho is the only model-based method that adequately  
187 accounts for changes in effective population (ReLERNN being a possible exception  
188 Adrion, Galloway, et al., 2020)

189 We followed the recommended practices for inferring recombination rate using pyrho  
190 (<https://github.com/popgenmethods/pyrho>). We parameterized the initial lookup tables  
191 using the effective population size and mutation rates used in the simulations (*unscaled*

192 in this case). To account for changes in effective population size, we created lookup  
193 tables that accounted for a change of  $N_e/2$  (1.72M to 8.6M) in time steps of 1751  
194 generations in the past. This allowed us to have an appropriately timed lookup table for  
195 each step of the simulation. We used the built-in methods to infer the hyperparameters  
196 of window size (best fit 100) and block penalty (best fit 1000). Using this baseline, we  
197 inferred recombination rates using the genotype data (VCF format) from both  
198 subpopulations at each time point, for a total of ~96 000 pyrho fits. All computation was  
199 performed using the Duke University Computing Cluster, running CentOS Version 8.

## 200 Statistical analyses

201 We performed all data processing and visualization using the tools of the tidyverse  
202 package in R 4.0.3 (R Core Team, 2018; Wickham, 2017). To examine how gene flow  
203 between populations affects the accuracy of LD-based estimates of recombination, and  
204 the context of the various factors explored in our simulations, we performed an analysis  
205 of variance using a linear mixed model with Gaussian errors fitted via the `lmer()`  
206 function from the `lme4` package (Bates et al., 2007). This model had the following form:  
207  $\text{Recombination rate} = (1|\text{simulation replicate}) + (1|\text{simulation generation}) + \text{gene flow}$   
208  $\text{magnitude} + \text{recombination rate change}$ , where  $(1|[\text{factor}])$  denotes a random intercept  
209 and “:” denotes an interaction. All variables were standardized (mean-centered and  
210 scaled by standard deviation) prior to analysis. To simplify interpretation, we fitted  
211 separate models for the continuous gene flow and secondary contact scenarios.

## 212 Results

### 213 Inference when recombination rate is identical between populations

214 When the recombination rate remained constant between diverging populations, we  
215 found that gene flow introduced two types of systematic biases in estimates of  
216 recombination rate within populations (Figure 2A). These effects began when  $N_e m \geq 1$   
217 in both the continuous gene flow and secondary contact models. First, in the model of  
218 continuous gene flow, when  $N_e m \geq 1$ , we observed a systematic increase (overestimate)  
219 in estimated rates of recombination in both populations (Figure 2A, 2B, top row,  $N_e m =$   
220 1-100). This increase was statistically significant (Type III Wald chi-square = 5090.07,  $p <$   
221  $2.0 \times 10^{-16}$ ; coefficient for gene flow = 0.63–0.67 (95% CI),  $t(19495) = 71.34$ ,  $p < 0.001$ ). When  
222 the migration rate was moderate to high ( $N_e m$  10-100), the recombination rate was  
223 overestimated by approximately 10-20% (Figure 2B). This effect is consistent with  
224 migration causing the populations to become coupled, behaving as a single population  
225 with a larger  $N_e$  and thus inflating the population-scaled estimate of recombination  
226 rate.

227 In contrast to the continuous gene flow case, under a model of secondary contact, there  
228 was a marked systematic decrease (underestimate) of recombination rates, which also  
229 became visible when  $N_e m \geq 1$  (Figure 2A, 2B, bottom row,  $N_e m = 1-100$ ). This decrease  
230 was statistically significant (Type III Wald chi-square = 1512,  $p < 2.2 \times 10^{-16}$ ; coefficient for  
231 gene flow = -(0.54–0.49) (95% CI),  $t(31846) = -38.88$ ,  $p < 0.001$ ). The magnitude of this  
232 decrease was substantial: on average, populations experiencing  $N_e m = 1$  had  
233 recombination rates about 20% lower than expected, with this increasing to 50% when

234  $N_e m = 10$  or higher (Figure 2A, Figure 2B). This decrease was accompanied by a  
235 statistically significant increase in the *variance* of recombination rate estimates,  
236 especially for  $N_e m = 1-10$  compared to  $N_e m < 1$  (Fig 2A, bottom row; F-test for  
237 equivalency of variance,  $F(10429,13860) = 0.20863$ ,  $p < 2.2 \times 10^{-16}$ ). A systematic increase in  
238 the mean and variance of LD within populations is consistent with allele frequency  
239 differences between populations manifesting as migration-associated LD, and deflating  
240 estimates of recombination rate. When gene flow was very high, there was a visible  
241 recovery of estimated recombination rates (Figure 2A, bottom row,  $N_e m = 100$ ),  
242 presumably due to migration homogenizing allele frequencies and increased effective  
243 population sizes increasing the rate at which recombination breaks down migration-  
244 associated LD.

245 When comparing recombination rates between  $p_1$  and  $p_2$ , the “coupling” bias observed  
246 in the continuous migration scenario did not appear to systematically affect the *ratio* of  
247 recombination rate between the two populations (Figure 2C, Continuous Migration).  
248 However, in keeping with the previous result, migration-associated LD in the secondary  
249 contact model appeared to greatly increase the variance in the ratio of recombination  
250 rates between populations when  $N_e m \geq 1$  (Figure 2C, Secondary Contact).

251 Inference when recombination rate differs between populations

252 When recombination rates diverged between populations, we also observed the two  
253 forms of bias described above (Figure 3). The estimates from the continuous gene flow  
254 scenario exhibited a statistically significant increase (Type III Wald chi-square =  
255  $8936.44$ ,  $p < 2.2 \times 10^{-16}$ ; coefficient for gene flow =  $0.65-0.67$  (95% CI),  $t(19495) = 94.53$ ,  $p <$

256 0.001) whereas estimates from the secondary contact model exhibited a statistically  
257 significant decrease (Type III Wald chi-square = 1512,  $p < 2.0 \times 10^{-16}$ ; coefficient for gene  
258 flow =  $-(0.27-0.22)$  (95% CI),  $t(34505) = -23.22$ ,  $p < 0.001$ ). However, the results differed  
259 from simulations with constant recombination rates in a number of important ways.  
260 First, there was a clear difference between the continuous migration and secondary  
261 contact models in the overall trajectory in the population-specific estimates of  
262 recombination rate (Figure 3A). In the continuous gene flow models, there was an  
263 overall positive trend for the estimates of recombination rate in  $p_2$  even in the absence  
264 of gene flow (Figure 3A, continuous migration). This was presumably caused by a lag in  
265 the establishment of equilibrium levels of LD within  $p_2$  that reflect the new  
266 recombination rate (which spontaneously changed at the time of divergence). This lag  
267 resulted in the recombination rate in  $p_2$  being consistently underestimated (because it  
268 had not reached its new equilibrium), in addition to the coupling effect observed  
269 previously (Figure 3B and 3C, continuous migration). In the case of the secondary  
270 contact model, we did not observe the same positive trend for recombination rate  
271 estimates in  $p_2$ , likely because the isolation period (1.7M generations) was sufficiently  
272 long enough for  $p_2$  to establish an equilibrium level of LD prior to secondary contact  
273 (Figure 3A, Secondary Contact).

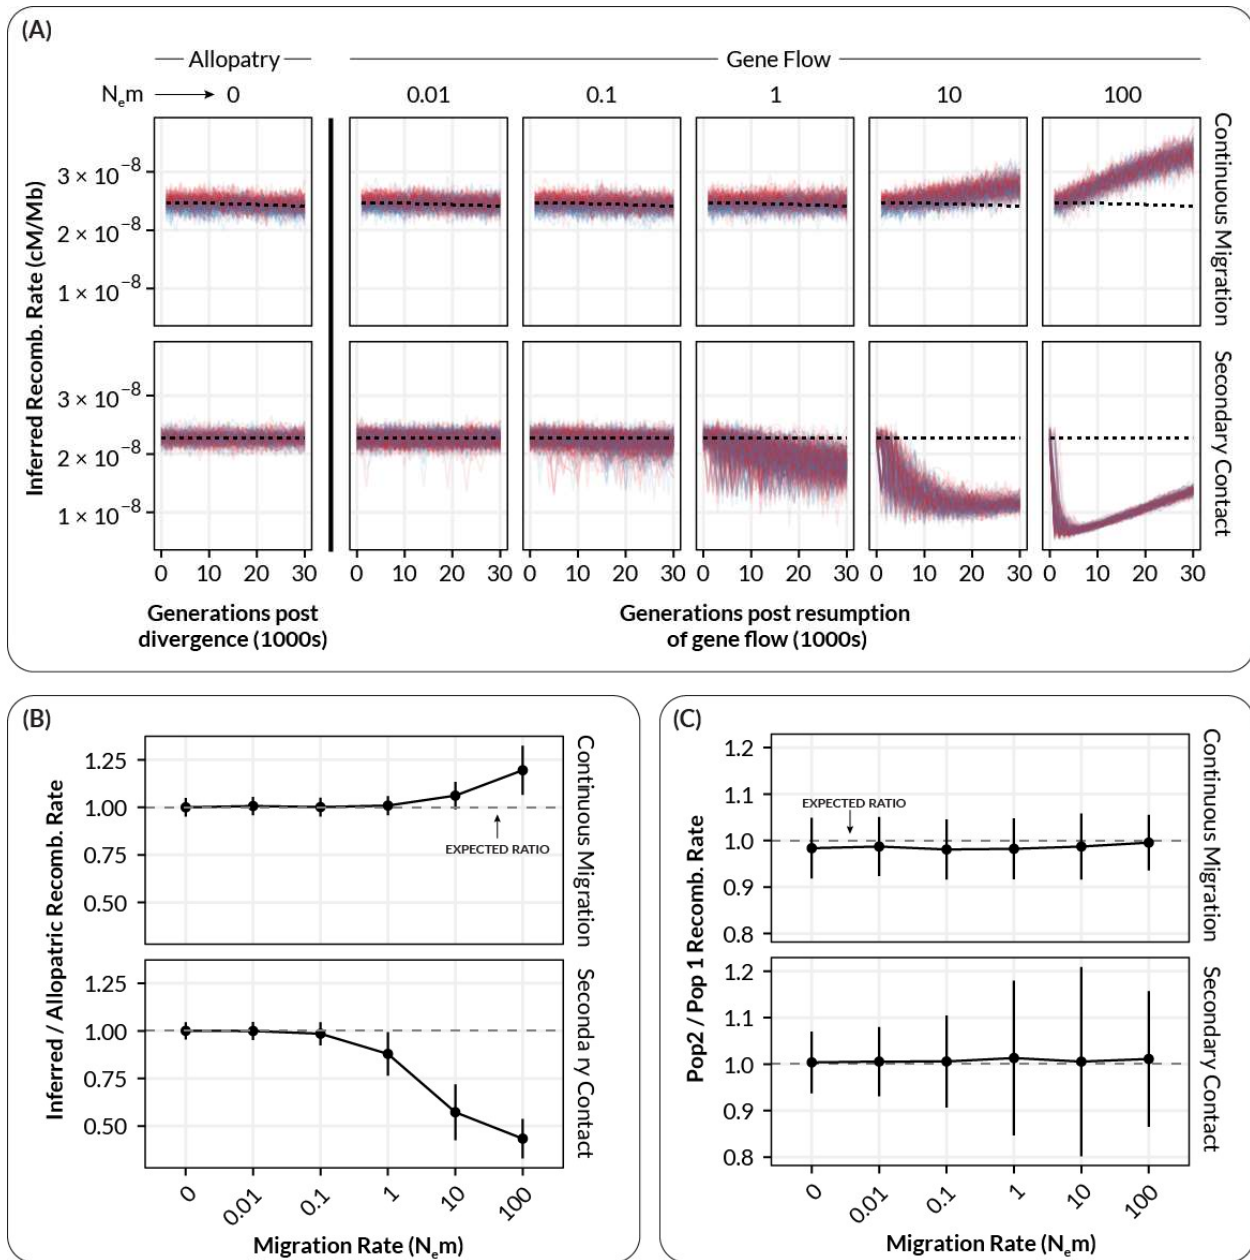

274 **Figure 2** | The relationship between inferred recombination rate and the migration rate in simulated  
 275 populations where recombination rate remains constant in both subpopulations. (A) Inferred  
 276 recombination rates for individual simulations at varying levels of migration. Each plot shows inferred  
 277 rates for simulation replicates (transparent lines) of population 1 (red, unchanged recombination) and  
 278 population 2 (blue, increased recombination) for a single migration rate. Dashed lines show the expected  
 279 inferred value in the absence of gene flow (inferred from  $N_e m = 0$ ). (B) Summarized inferred recombination  
 280 rates (y-axis) for each level of migration (x-axis) from the simulations in A. Points are mean values and

281 error bars depict standard deviations (summarized across all generations). Dashed lines show the  
282 expected inferred value in the absence of gene flow for each population (i.e. the mean value for  $N_e m = 0$ ).  
283 (C) The inferred *difference* in recombination rate between population 1 and population 2 ( $p_2 - p_1$ ) as a  
284 function of migration rate. Points and errors bars are as in B.

285 In keeping with the scenario with constant recombination rates, starting at  $N_e m \sim 1$ ,  
286 migration-associated LD resulted in the systematic underestimation and increase in  
287 variance for estimated recombination rates within both  $p_1$  and  $p_2$  (Figure 3B, Secondary  
288 Contact; Type III Wald chi-square = 538.97,  $p < 2.0 \times 10^{-16}$ ; coefficient for gene flow = -  
289 (0.27-22) (95% CI),  $t(34505) = -23.22$ ,  $p < 0.001$ ; F-test for equivalency of variance,  
290  $F(7734, 13579) = 0.2174$ ,  $p < 2.2 \times 10^{-16}$ ). In addition, the observed divergence in  
291 recombination rate between  $p_2$  and  $p_1$  (which was always expected to be +2 cM/Mb)  
292 decreased with increasing levels of gene flow (Figures 3B and 3C, Secondary Contact).  
293 This effect would likely result in an increase in false negatives with increasing gene  
294 flow (i.e. finding no difference in recombination rate between populations when there is  
295 in fact one). This decrease in the observed divergence between populations is again  
296 likely the outcome of the population-specific levels of LD becoming coupled/merged at  
297 moderate to high levels of gene flow, resulting in the populations exhibiting LD (and  
298 hence recombination rate estimates) intermediate to what would be expected in the  
299 absence of gene flow.



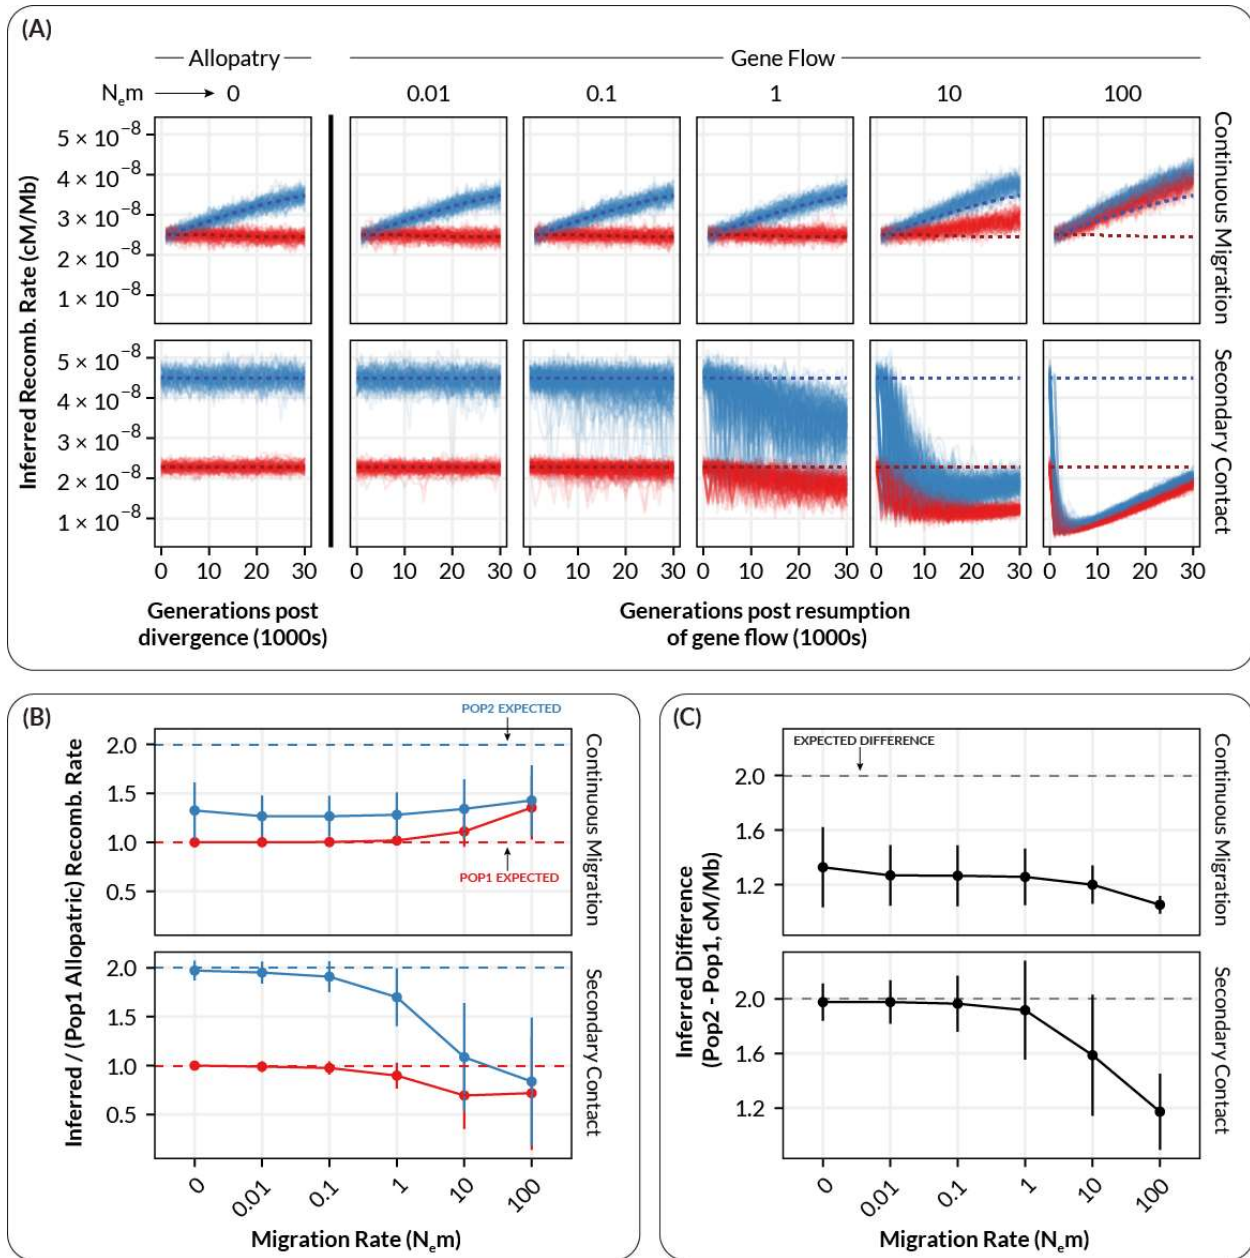

300 **Figure 3** | The relationship between inferred recombination rate and the migration rate in simulated  
 301 populations where recombination rate increases by a factor of two in one subpopulation. (A) Inferred  
 302 recombination rates for individual simulations at varying levels of migration. Each plot shows inferred  
 303 rates for simulation replicates (transparent lines) of population 1 (red, unchanged recombination) and  
 304 population 2 (blue, increased recombination) for a single migration rate. Dashed lines show the expected  
 305 inferred value in the absence of gene flow (inferred from  $N_e m = 0$ ). (B) Summarized inferred recombination  
 306 rates (y-axis) for each level of migration (x-axis) from the simulations in A. Points are mean values and

307 error bars depict standard deviations (summarized across all generations). Dashed lines show the  
308 expected inferred value in the absence of gene flow for each population (i.e. the mean value for  $N_e m = 0$ ).  
309 (C) The inferred *difference* in recombination rate between population 1 and population 2 ( $p_2 - p_1$ ) as a  
310 function of migration rate. Points and errors bars are as in B.

## 311 Discussion

312 Accurate estimates of recombination rate are key to understanding the causes and  
313 consequences of recombination rate variation in natural populations. With the  
314 increasing availability of genome-wide sequencing data, LD-based estimators of  
315 recombination rate have become widely used in a large variety of taxa. However, while  
316 gene flow is widely known to shape patterns of LD in populations, the effect of gene  
317 flow on LD-based estimators of recombination rate remains largely unexplored. Here,  
318 use forward-time simulations to show that (1) gene flow can introduce substantial bias  
319 into LD-based estimates of genome-wide recombination rate and (2) the nature of this  
320 bias depends on the demographic and evolutionary history of the populations in  
321 question.

322 Our results here are consistent with theoretical predictions that gene flow between  
323 populations can affect LD: increasing in the magnitude and variance of LD at low  
324 migration rates as well as reducing LD via the “coupling effect” we observed at higher  
325 rates of gene flow. Our study shows how these predictions play out with modern  
326 methods and genomic data, and also provides a sense of the magnitude of the potential  
327 degree of misestimation - in our case, ranging from 20-50 percentage points in cases of  
328 moderate gene flow. For comparison, a recent study of population-level differences in

329 recombination rate in *Drosophila pseudoobscura* revealed genetically based  
330 interpopulation differences on the magnitude of approximately 10% measured using  
331 replicated linkage maps in each population (Samuk et al., 2020). Using LD-based  
332 estimators, an observed difference of this magnitude could be spuriously generated by  
333 modest levels of gene flow alone, or missed altogether due to coupling at higher level  
334 gene flow is high. In addition, the specific magnitude and direction of the bias  
335 introduced by gene flow is difficult to know without precise knowledge of the  
336 population/demographic histories of the populations in question. This should give  
337 pause to anyone planning on using LD-based methods to infer recombination rate in  
338 non-equilibrium populations.

339 One key question is whether there are methods to control for or counteract the  
340 increased variance and/or biases in the estimation of recombination rate caused by gene  
341 flow. One approach could be to identify and remove introgressed haplotypes from  
342 datasets prior to inferring recombination rate, thereby removing migration-associated  
343 LD. This would require “pure” samples from the source populations, such that the  
344 population of origin could be assigned to haplotype blocks (Dias-Alves et al., 2018).  
345 However, this method would only work if gene flow is infrequent enough that coupling  
346 (of both LD and allele frequencies) has not occurred. The upward bias and increased  
347 variance in recombination rate that occurs as a result of coupling, together with the  
348 homogenization of allelic differences between populations at higher levels of gene flow  
349 will likely make a “filtering” scheme very difficult (perhaps impossible) to achieve. One  
350 approach may be to attempt to jointly estimate a demographic model along with  
351 population-specific recombination rates, as has been done with mutation rates (DeWitt

352 et al., 2021). However, given the existing complexity and uncertainty in inferring  
353 demographic models, we suspect it may be difficult to disentangle the complex  
354 interdependencies between gene flow, population size, and estimates of recombination  
355 rate.

356 Together with previous work (Dapper & Payseur, 2018), our results suggest that LD-  
357 based estimates of recombination rate need to be interpreted with great caution when  
358 studying non-equilibrium populations. Indeed, these methods are likely only  
359 appropriate when populations can be assumed to be evolving in the absence of any gene  
360 flow, and have reached a reasonable demographic equilibrium. However, it is now  
361 widely appreciated that gene flow is ubiquitous in natural populations (Ellstrand &  
362 Rieseberg, 2016; Waples & Gaggiotti, 2006). This may mean that many published LD-  
363 based estimates of recombination rate are incorrect. Without empirical maps to  
364 compare existing LD-based estimates, it is difficult to say just how incorrect. What can  
365 be said is that the levels of gene flow required to introduce non-trivial biases into  
366 estimates of recombination rate, i.e.  $N_e m \sim 1-10$ , are not uncommon in natural  
367 populations (Slarkin, 1985; Waples & Gaggiotti, 2006). It is also worth noting that it is  
368 not the case that two populations being studied have to be exchanging genes themselves  
369 (e.g. which would not be the case when studying two reproductively different species), but  
370 just that one or more of the populations are exchanging genes with some *other*  
371 population (e.g. an unsampled population of the same species).

372 If many LD-based estimates are incorrect, why do published LD-based estimates of  
373 recombination rate correlate well with direct estimates, e.g. from genetic maps? (Chan,

374 Jenkins, et al., 2012; Gil McVean & Auton, 2007; Smukowski Heil et al., 2015). There are  
375 several considerations. First, the correlations that have been reported are by no means  
376 perfect (e.g.  $\sim$ Spearman's Rho of 0.6: Smukowski-Heil et al. 2015;  $r^2 = 0.37-63$ : Chan,  
377 Song, et al., 2012) and depend greatly on the genomic scale at which they are measured  
378 (Smukowski-Heil et al. 2015). Second, simple correlations between LD-based and  
379 empirical estimates cannot detect genome-wide differences in the estimates of  
380 recombination rate, such as those due to the coupling effects we observed. Such effects  
381 would be visible as differences in the *intercept* of a linear regression, rather than the  $R^2$ ,  
382 for example. Finally, the species where these correlations have been examined (humans  
383 and *Drosophila melanogaster*) may meet the assumptions of demographic equilibrium  
384 more readily (Ochoa & Storey, 2019; Suvorov et al., 2021). While such assumptions may  
385 be reasonable for these populations, for which LD-based estimators were originally  
386 developed, they are much less likely to hold in many natural populations. Notably, they  
387 are likely rarely met in populations that have recently adaptively diverged in the  
388 presence of gene flow, which have lately been the subject of increased research interest  
389 (Linck & Battey, 2019; Ravinet et al., 2017). The equilibrium assumption is likely not  
390 valid in populations in which the recombination rate has recently changed (Brandvain &  
391 Wright, 2016), reducing the utility of these estimates for studying the rapid evolution of  
392 recombination rates.

393 While we only focused on a single implementation of one type of LD-based estimator of  
394 recombination ( $\rho$ ), it is likely that other population genetic methods will also suffer  
395 from the effects we describe here. LD is the “information” used by all estimators, either  
396 directly as in methods like LDjump (Hermann et al., 2019) or indirectly as in machine

397 learning methods like ReLERNN (Adrion, Galloway, et al., 2020). That said, in the case  
398 of the latter method, it may be possible to overcome some of the issues we've identified  
399 if the training datasets were simulated with an accurate demographic model. As such,  
400 the distorting effects of gene flow on LD need to be carefully considered when applying  
401 any statistical methods for inferring recombination rate approaches. We also stress that  
402 our simulations do not suggest that LD-based estimators and their implementations are  
403 wrong per se, but rather that the assumptions under which LD-based estimates are  
404 biologically accurate are readily violated by levels of gene flow and divergence common  
405 seen in natural populations.

#### 406 Conclusion

407 Studying variation in recombination rate is difficult. LD-based methods for inferring  
408 recombination rate are attractive in their data requirements, but require strong  
409 assumptions to be met. As we have shown here, gene flow readily violates these  
410 assumptions and introduces biases and decreases in precision, in a variety of ways that  
411 are difficult to identify in a given study population. This is problematic because gene  
412 flow is extremely common in natural populations. How should we proceed? Rather than  
413 attempt to squeeze blood from the proverbial stone, we believe that the most  
414 straightforward solution to the problems we outline here is simply to prioritize the use  
415 of direct, empirical methods for measuring of recombination rate. This decision is made  
416 hopefully simpler with the increased ease and low cost of creating traditional linkage  
417 maps and performing gamete sequencing. That said, LD-based approaches remain  
418 important tools for hypothesis generation, and when paired with direct estimates of

419 recombination rate can provide a detailed picture of both the past and present  
420 landscape of recombination rates in natural populations.

## 421 Acknowledgements

422 Support this project was provided by National Science Foundation grants DEB-1545627,  
423 1754022, and 1754439 to MAFN. KS was additionally supported by a Natural Sciences  
424 and Engineering Research Council of Canada Postdoctoral Fellowship. We thank  
425 members of the Noor lab and Dr. Katharine Korunes for helpful discussions and for  
426 providing comments on an early draft of this paper.

## 427 References

- 428 Adrion, J. R., Cole, C. B., Dukler, N., Galloway, J. G., Gladstein, A. L., Gower, G.,  
429 Kyriazis, C. C., Ragsdale, A. P., Tsambos, G., Baumdicker, F., Carlson, J.,  
430 Cartwright, R. A., Durvasula, A., Gronau, I., Kim, B. Y., McKenzie, P., Messer, P.  
431 W., Noskova, E., Ortega-Del Vecchyo, D., ... Kern, A. D. (2020). A community-  
432 maintained standard library of population genetic models. *eLife*, 9.  
433 <https://doi.org/10.7554/eLife.54967>
- 434 Adrion, J. R., Galloway, J. G., & Kern, A. D. (2020). Predicting the Landscape of  
435 Recombination Using Deep Learning. *Molecular Biology and Evolution*, 37(6), 1790–  
436 1808.
- 437 Auton, A., & McVean, G. (2007). Recombination rate estimation in the presence of  
438 hotspots. *Genome Research*, 17(8), 1219–1227.
- 439 Barton, N. H. (2008). The role of hybridization in evolution. *Molecular Ecology*, 10(3), 551–  
440 568.

- 441 Bates, D., Sarkar, D., Bates, M. D., & Matrix, L. (2007). The lme4 package. *R Package*  
442 *Version*, 2(1), 74.
- 443 Begun, D. J., & Aquadro, C. F. (1992). Levels of naturally occurring DNA polymorphism  
444 correlate with recombination rates in *D. melanogaster*. *Nature*, 356(6369), 519–520.
- 445 Brandvain, Y., & Wright, S. I. (2016). The Limits of Natural Selection in a  
446 Nonequilibrium World. *Trends in Genetics: TIG*, 32(4), 201–210.
- 447 Broman, K. W. (2010). Genetic map construction with R/qtl. *University of Wisconsin-*  
448 *Madison, Department of Biostatistics & Medical*.  
449 [https://biostat.wisc.edu/~kbroman/publications/tr\\_214.pdf](https://biostat.wisc.edu/~kbroman/publications/tr_214.pdf)
- 450 Burri, R. (2017). Interpreting differentiation landscapes in the light of long-term linked  
451 selection. *Evolution Letters*, 1(3), 118–131.
- 452 Chan, A. H., Jenkins, P. A., & Song, Y. S. (2012). Genome-wide fine-scale recombination  
453 rate variation in *Drosophila melanogaster*. *PLoS Genetics*, 8(12), e1003090.
- 454 Chan, A. H., Song, Y. S., & Jenkins, P. A. (2012). Genome-Wide Fine-Scale  
455 Recombination Rate Variation in *Drosophila melanogaster*. *PLoS Genetics*, 8(12),  
456 e1003090.
- 457 Comeron, J. M., Ratnappan, R., & Bailin, S. (2012). The many landscapes of  
458 recombination in *Drosophila melanogaster*. *PLoS Genetics*, 8(10), e1002905.
- 459 Cutter, A. D. (2019). Recombination and linkage disequilibrium in evolutionary  
460 signatures. In *A Primer of Molecular Population Genetics* (pp. 113–128).  
461 <https://doi.org/10.1093/oso/9780198838944.003.0006>
- 462 Dapper, A. L., & Payseur, B. A. (2017). Connecting theory and data to understand  
463 recombination rate evolution. *Philosophical Transactions of the Royal Society of*



- 464 *London. Series B, Biological Sciences*, 372(1736), 20160469.
- 465 Dapper, A. L., & Payseur, B. A. (2018). Effects of Demographic History on the Detection  
466 of Recombination Hotspots from Linkage Disequilibrium. *Molecular Biology and*  
467 *Evolution*, 35(2), 335–353.
- 468 DeWitt, W. S., Harris, K. D., Ragsdale, A. P., & Harris, K. (2021). Nonparametric  
469 coalescent inference of mutation spectrum history and demography. *Proceedings of*  
470 *the National Academy of Sciences of the United States of America*, 118(21).  
471 <https://doi.org/10.1073/pnas.2013798118>
- 472 Dias-Alves, T., Mairal, J., & Blum, M. G. B. (2018). Loter: A Software Package to Infer  
473 Local Ancestry for a Wide Range of Species. *Molecular Biology and Evolution*, 35(9),  
474 2318–2326.
- 475 Dréau, A., Venu, V., Avdievich, E., Gaspar, L., & Jones, F. C. (2019). Genome-wide  
476 recombination map construction from single individuals using linked-read  
477 sequencing. *Nature Communications*, 10(1), 4309.
- 478 Dumont, B. L., & Payseur, B. A. (2008). Evolution of the genomic rate of recombination  
479 in mammals. *Evolution; International Journal of Organic Evolution*, 62(2), 276–294.
- 480 Ellstrand, N. C., & Rieseberg, L. H. (2016). When gene flow really matters: gene flow in  
481 applied evolutionary biology. *Evolutionary Applications*, 9(7), 833–836.
- 482 Haddrill, P. R., Charlesworth, B., Halligan, D. L., & Campos, J. L. (2014). The relation  
483 between recombination rate and patterns of molecular evolution and variation in  
484 *Drosophila melanogaster*. *Molecular Biology and Evolution*, 31(4), 1010–1028.
- 485 Haller, B. C., & Messer, P. W. (2019). SLiM 3: Forward Genetic Simulations Beyond the  
486 Wright-Fisher Model. *Molecular Biology and Evolution*, 36(3), 632–637.

- 487 Hermann, P., Heissl, A., Tiemann-Boege, I., & Futschik, A. (2019). LDJump: Estimating  
488 variable recombination rates from population genetic data. *Molecular Ecology*  
489 *Resources*, 19(3), 623–638.
- 490 Hunter, C. M., Huang, W., Mackay, T. F. C., & Singh, N. D. (2016). The Genetic  
491 Architecture of Natural Variation in Recombination Rate in *Drosophila*  
492 *melanogaster*. *PLoS Genetics*, 12(4), e1005951.
- 493 Johnston, S. E., Béréños, C., Slate, J., & Pemberton, J. M. (2016). Conserved Genetic  
494 Architecture Underlying Individual Recombination Rate Variation in a Wild  
495 Population of Soay Sheep (*Ovis aries*). *Genetics*, 203(1), 583–598.
- 496 Kamm, J. A., Spence, J. P., Chan, J., & Song, Y. S. (2016). Two-Locus Likelihoods Under  
497 Variable Population Size and Fine-Scale Recombination Rate Estimation. *Genetics*,  
498 203(3), 1381–1399.
- 499 Korunes, K. L., Samuk, K., & Noor, M. A. F. (2021). Disentangling Types of Linked  
500 Selection Using Patterns of Nucleotide Variation in *Drosophila pseudoobscura*. In  
501 *Population Genomics* (pp. 1–22). Springer International Publishing.
- 502 Li, H., & Stephan, W. (2006). Inferring the demographic history and rate of adaptive  
503 substitution in *Drosophila*. *PLoS Genetics*, 2(10), e166.
- 504 Linck, E., & Battey, C. J. (2019). *On the relative ease of speciation with periodic gene flow*.  
505 <https://doi.org/10.1101/758664>
- 506 Lloyd, A., Morgan, C., H Franklin, F. C., & Bomblies, K. (2018). Plasticity of Meiotic  
507 Recombination Rates in Response to Temperature in *Arabidopsis*. *Genetics*, 208(4),  
508 1409–1420.
- 509 Mallet, J. (2005). Hybridization as an invasion of the genome. *Trends in Ecology &*

- 510        *Evolution*, 20(5), 229–237.
- 511    McVean, G. (2007). Linkage Disequilibrium, Recombination and Selection. In D. J.  
512        Balding, M. Bishop, & C. Cannings (Eds.), *Handbook of Statistical Genetics* (pp. 909–  
513        944). John Wiley & Sons, Ltd.
- 514    McVean, G., & Auton, A. (2007). LDhat 2.1: a package for the population genetic analysis  
515        of recombination. *Department of Statistics, Oxford, OX1 3TG, UK.*  
516        <http://www.stats.ox.ac.uk/~mcvean/LDhat/manual.pdf>
- 517    Morjan, C. L., & Rieseberg, L. H. (2004). How species evolve collectively: implications of  
518        gene flow and selection for the spread of advantageous alleles. *Molecular Ecology*,  
519        13(6), 1341–1356.
- 520    Nei, M., & Li, W.-H. (1973). LINKAGE DISEQUILIBRIUM IN SUBDIVIDED  
521        POPULATIONS. In *Genetics* (Vol. 75, Issue 1, pp. 213–219).  
522        <https://doi.org/10.1093/genetics/75.1.213>
- 523    Ochoa, A., & Storey, J. D. (2019). New kinship and FST estimates reveal higher levels of  
524        differentiation in the global human population. *BioRxiv*.  
525        <https://www.biorxiv.org/content/10.1101/653279v1.abstract>
- 526    Ohta, T. (1982). Linkage disequilibrium with the island model. *Genetics*, 101(1), 139–155.
- 527    Peñalba, J. V., & Wolf, J. B. W. (2020). From molecules to populations: appreciating and  
528        estimating recombination rate variation. *Nature Reviews. Genetics*, 21(8), 476–492.
- 529    Peterson, A. L., Miller, N. D., & Payseur, B. A. (2019). Conservation of the genome-wide  
530        recombination rate in white-footed mice. *Heredity*, 123(4), 442–457.
- 531    Peterson, A. L., & Payseur, B. A. (2021). Sex-specific variation in the genome-wide  
532        recombination rate. *Genetics*, 217(1), 1–11.

- 533 Rastas, P. (2017). Lep-MAP3: robust linkage mapping even for low-coverage whole  
534 genome sequencing data. *Bioinformatics*, 33(23), 3726–3732.
- 535 Ravinet, M., Faria, R., Butlin, R. K., Galindo, J., Bierne, N., Rafajlović, M., Noor, M. A.  
536 F., Mehlig, B., & Westram, A. M. (2017). Interpreting the genomic landscape of  
537 speciation: a road map for finding barriers to gene flow. *Journal of Evolutionary*  
538 *Biology*, 30(8), 1450–1477.
- 539 R Core Team. (2018). *R: A language and environment for statistical computing*. R Foundation  
540 for Statistical Computing, Vienna, Austria. <https://www.R-project.org/>
- 541 Ritz, K. R., Noor, M. A. F., & Singh, N. D. (2017). Variation in Recombination Rate:  
542 Adaptive or Not? *Trends in Genetics: TIG*, 33(5), 364–374.
- 543 Rommel Fuentes, R., Hesselink, T., Nieuwenhuis, R., Bakker, L., Schijlen, E., van  
544 Dooijeweert, W., Diaz Trivino, S., de Haan, J. R., Sanchez Perez, G., Zhang, X.,  
545 Fransz, P., de Jong, H., van Dijk, A. D. J., de Ridder, D., & Peters, S. A. (2019).  
546 Meiotic recombination profiling of interspecific hybrid F1 tomato pollen by linked  
547 read sequencing. *The Plant Journal: For Cell and Molecular Biology*.  
548 <https://doi.org/10.1111/tpj.14640>
- 549 Roux, C., Fraïsse, C., Romiguier, J., Anciaux, Y., Galtier, N., & Bierne, N. (2016).  
550 Shedding Light on the Grey Zone of Speciation along a Continuum of Genomic  
551 Divergence. *PLoS Biology*, 14(12), e2000234.
- 552 Samuk, K., Manzano-Winkler, B., Ritz, K. R., & Noor, M. A. F. (2020). Natural Selection  
553 Shapes Variation in Genome-wide Recombination Rate in *Drosophila*  
554 *pseudoobscura*. *Current Biology: CB*, 30(8), 1517–1528.e6.
- 555 Samuk, K., Owens, G. L., Delmore, K. E., Miller, S. E., Rennison, D. J., & Schluter, D.  
556 (2017). Gene flow and selection interact to promote adaptive divergence in regions

- 557 of low recombination. *Molecular Ecology*, 26(17), 4378–4390.
- 558 Schumer, M., Xu, C., Powell, D. L., Durvasula, A., Skov, L., Holland, C., Blazier, J. C.,  
559 Sankararaman, S., Andolfatto, P., Rosenthal, G. G., & Przeworski, M. (2018). Natural  
560 selection interacts with recombination to shape the evolution of hybrid genomes.  
561 *Science*, 360(6389), 656–660.
- 562 Slarkin, M. (1985). Gene Flow in Natural Populations. *Annual Review of Ecology and*  
563 *Systematics*, 16(1), 393–430.
- 564 Smukowski Heil, C. S., Ellison, C., Dubin, M., & Noor, M. A. F. (2015). Recombining  
565 without Hotspots: A Comprehensive Evolutionary Portrait of Recombination in  
566 Two Closely Related Species of *Drosophila*. *Genome Biology and Evolution*, 7(10),  
567 2829–2842.
- 568 Spence, J. P., & Song, Y. S. (2019). Inference and analysis of population-specific fine-  
569 scale recombination maps across 26 diverse human populations. *Science Advances*,  
570 5(10), eaaw9206.
- 571 Stapley, J., Feulner, P. G. D., Johnston, S. E., Santure, A. W., & Smadja, C. M. (2017).  
572 Variation in recombination frequency and distribution across eukaryotes: patterns  
573 and processes. *Philosophical Transactions of the Royal Society of London. Series B,*  
574 *Biological Sciences*, 372(1736). <https://doi.org/10.1098/rstb.2016.0455>
- 575 Stumpf, M. P. H., & McVean, G. A. T. (2003). Estimating recombination rates from  
576 population-genetic data. *Nature Reviews. Genetics*, 4(12), 959–968.
- 577 Suvorov, A., Kim, B. Y., Wang, J., Armstrong, E. E., Peede, D., D'Agostino, E. R. R.,  
578 Price, D. K., Wadell, P., Lang, M., Courtier-Orgogozo, V., David, J. R., Petrov, D.,  
579 Matute, D. R., Schrider, D. R., & Comeault, A. A. (2021). Widespread introgression  
580 across a phylogeny of 155 *Drosophila* genomes. In *bioRxiv* (p. 2020.12.14.422758).

581 <https://doi.org/10.1101/2020.12.14.422758>

582 Waples, R. S., & Gaggiotti, O. (2006). What is a population? An empirical evaluation of  
583 some genetic methods for identifying the number of gene pools and their degree of  
584 connectivity. *Molecular Ecology*, 15(6), 1419–1439.

585 Wickham, H. (2017). The tidyverse. *R Package Ver. 1.1*.

586 [https://slides.nyhackr.org/presentations/The-Tidyverse\\_Hadley-Wickham.pdf](https://slides.nyhackr.org/presentations/The-Tidyverse_Hadley-Wickham.pdf)

587 Xu, P., Kennell, T., Gao, M., Human Genome Structural Variation Consortium,  
588 Kimberly, R. P., & Chong, Z. (2020). MRLR: unraveling high-resolution meiotic  
589 recombination by linked reads. *Bioinformatics*, 36(1), 10–16.

590

591 Supplemental Material

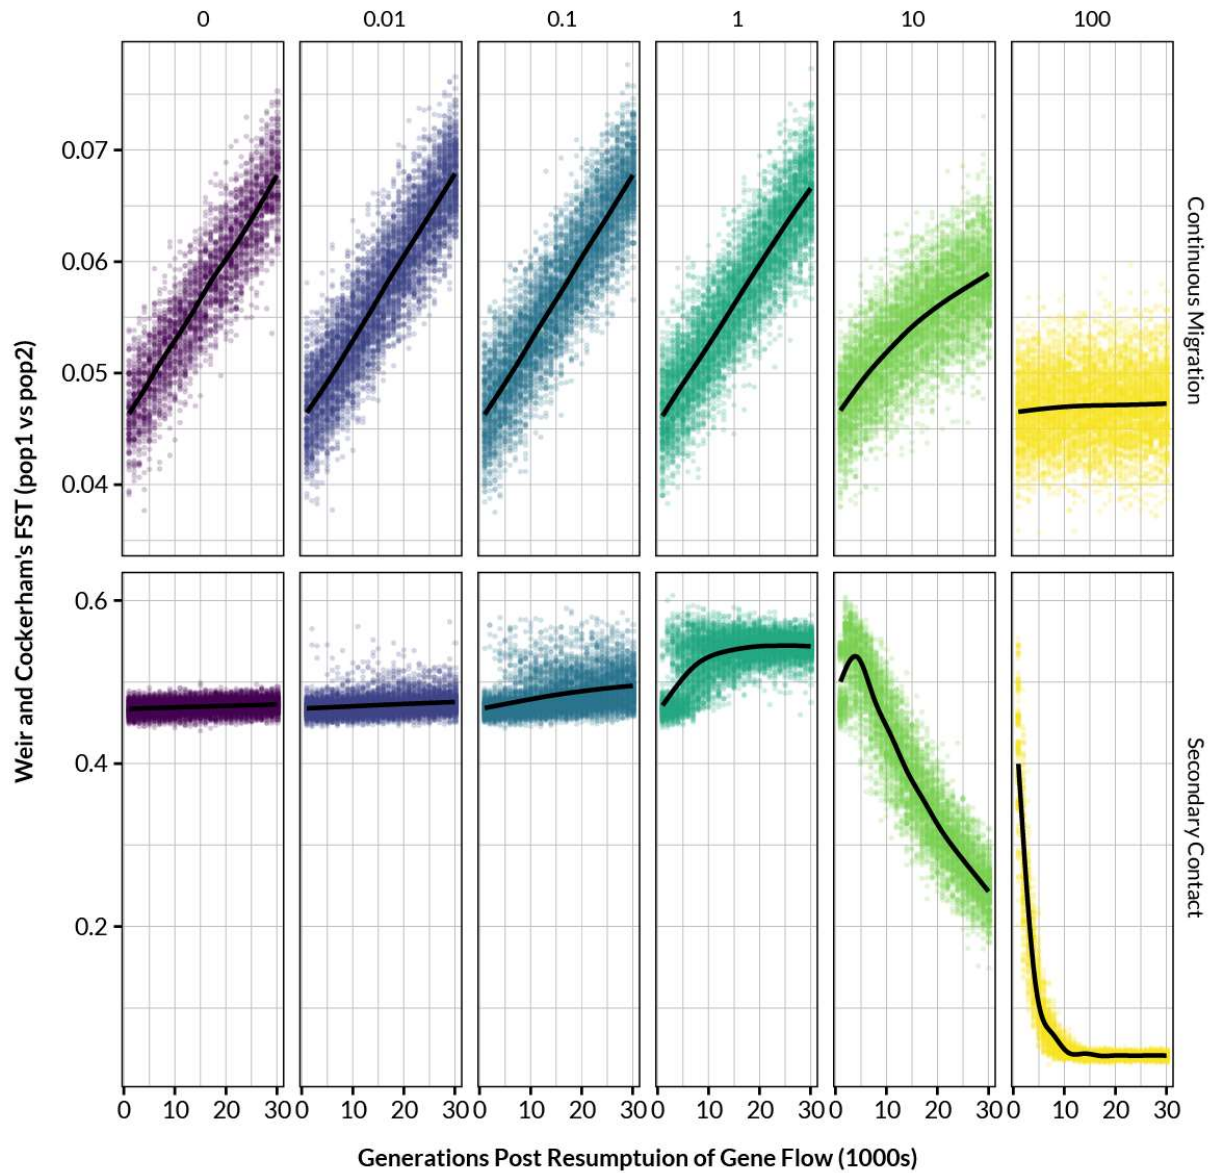

592  
593 **Figure S1** | Weir and Cockerham's FST between simulated populations as a function of time in  
594 generations under various combinations of migration rate (columns,  $N_e m$ ) and isolation scenario (rows).  
595 Black lines are smoothed LOESS fits. Note the difference in y-axis scales between the rows.
